# Supplementary material for: A Prevalent CXCR3+ Phenotype of Circulating Follicular Helper T Cells Indicates Humoral Dysregulation in Children with Down Syndrome
Source: Springer Nature journal article supplement (doi:10.1007/s10875-020-00755-0), 2020-01-28
Supplement: MOESM7 [file 17602410]

**Supplementary Tables**

**Table S1** List of the antibodies and fluorophore conjugates used, including the dye, commercial source, clone, and catalog number.

| Antibody | Flurocrome | COMPANY | CLONE | CAT# |
| --- | --- | --- | --- | --- |
| CD3 | APC/Cy7 | Miltenyi | BW264/56 | 130-096-610 |
| CD4 | PeCy7 | Miltenyi | M-T321 | 130-100-361 |
| CD4 | PerCP | Miltenyi | VIT4 | 130-113-217 |
| CD4 | FITC | Biolegend | SK3 | 344604 |
| CD25 | APC | BD Biosciences | 2A3 | 340907 |
| CD19 | PO | BD Biosciences | SJ25C1 | 562947 |
| CD14 | PO | Miltenyi | TÜK4 | 130-096-875 |
| CD8 | PO | Miltenyi | BW135/80 | 130-096-902 |
| CXCR5 | PB | Biolegend | J252D4 | 356920 |
| CD45 | PO | Miltenyi | 5B1 | 130-113-124 |
| PD-1 | Pe | eBiosciences | eBioJ105 | 12-2799-42 |
| CXCR3 | APC | BD Biosciences | 1C6/CXCR3 | 550967 |
| CCR6 | PerCP/Cy5.5 | Biolegend | G034E3 | 353406 |
| FOXP3 | FITC | Biolegend | 259D | 3202212 |
| CD27 | PE | BD Biosciences | L128 | 340425 |
| CD38 | APC/Cy7 | Biolegend | HIT2 | 303534 |
| CD38 | PERCP | Biolegend | HIT2 | 303520 |
| CD20 | APC | Miltenyi | LT20 | 130-097-619 |
